# Supplementary material
Source: PubMed Central journal article supplement (PMC6792361)
Supplement: ehp-127-067006-s002.pdf [file ehp-127-067006-s002.pdf]

**Note to readers with disabilities:** *EHP* strives to ensure that all journal content is accessible to all readers. However, some figures and Supplemental Material published in *EHP* articles may not conform to [508 standards](#) due to the complexity of the information being presented. If you need assistance accessing journal content, please contact [ehp508@niehs.nih.gov](mailto:ehp508@niehs.nih.gov). Our staff will work with you to assess and meet your accessibility needs within 3 working days.

### **Supplemental Material**

#### **Tap Water Contributions to Plasma Concentrations of Poly- and Perfluoroalkyl Substances (PFAS) in a Nationwide Prospective Cohort of U.S. Women**

Xindi C. Hu, Andrea K. Tokranov, Jahred Liddie, Xianming Zhang, Philippe Grandjean, Jaime E. Hart, Francine Laden, Qi Sun, Leo W. Y. Yeung, and Elsie M. Sunderland

#### **Table of Contents**

**Section S1.** Supplemental information on methods.

Literature review for toxicokinetic (TK) modeling parameters

**Section S2.** Supporting Tables and Figures.

**Table S1.** Drinking water guideline levels for PFASs.

**Table S2.** Comparison of demographic, biometric and lifestyle factors for Nurses' Health Study participants included in this study and the full cohort.

**Table S3.** PFASs measured in drinking water and limits of detection (LOD).

**Table S4.** LC-MS/MS and EOF recovery and precision results.

**Table S5.** PFASs measured in plasma samples and coefficient of variation (CV%).

**Table S6.** Summary of toxicokinetic model parameters.

**Table S7.** Mean and variance of reported values on PFAS half-lives in human plasma or serum (in years).

**Table S8.** Drinking water samples collected in 2016.

**Table S9.** Search strategy used to identify PFAS industrial sources in Toxic Release Inventory.

**Table S10.** Modeled relative source contribution (%) of tap water to overall PFAS exposure among 110 Nurses' Health Study participants in 1989/1990.

**Table S11.** Modeled relative source contribution (%) of tap water to overall PFAS exposure stratified by number of years living in the current residence.

**Table S12.** Comparison of the relative source contribution (RSC) of tap water estimated using the deterministic toxicokinetic model and estimated using a Monte Carlo (MC) simulation.

**Figure S1.** Chromatograms of PFASs in an extract of HDPE water sampling bottle, analyzed using an Agilent 6460 LC-MS/MS equipped with an online-SPE system (Agilent 1290 Infinity Flex Cube) in dynamic multiple reaction mode.

**Figure S2.** The distribution of estimated median relative source contribution from tap water among 300 Monte Carlo simulations that consider interindividual variability in TK parameters and drinking water consumption rates.

**Figure S3.** Sensitivity analysis showing contribution of each input parameter of the one-compartment toxicokinetic model to the variability of estimated relative source contribution of tap water. Contribution of different input parameters was calculated as the square of the correlation coefficient between input parameter and estimated RSC, normalized to the sum of the squared correlation coefficients (Wang et al. 2016).  $V_D$  stands for volume of distribution, DW stands for drinking water consumption rate.

**Figure S4.** Number of relevant industrial sites in Massachusetts from 1987 to 2015, as reported in EPA Toxic Release Inventory database. No information on the magnitudes of PFAS releases is available in this database so we identified relevant industrial sources following the methods outline in previous work using the North American Industrial Classification System (NAICS) code (Zhang et al. 2016). Full list of NAICS code is provided in Table S10.

## References
